# Supplementary material for: Neurodevelopmental LincRNA Microsyteny Conservation and Mammalian Brain Size Evolution
Source: PLoS One. 2015 Jul 2;10(7):e0131818. doi: 10.1371/journal.pone.0131818 (PMC4489927; doi:10.1371/journal.pone.0131818)
Supplement: S3 Table — (XLS) [file pone.0131818.s004.xls]

## Sheet: Sheet1
Table S3: PhastCons and PhyloP conservation scores for lincRNA expressed during human neurogenesis (not conserved in mouse)
lincRNA ID	Phast mean	Phast median	Phylop mean	Phylop median	Transcription factor neighbor
XLOC_010472	0.30871	0.156693	0.174286	0.45137	Yes
XLOC_010504	0.187298	0.015685	0.0101757	0.363102	Yes
XLOC_010727	0.196765	0.11011	0.0838317	0.369402	Yes
XLOC_010839	0.0638847	0.0202913	0.0348258	0.403551	No
XLOC_010952	0.100971	0.0270079	-0.0123944	0.241811	No
XLOC_011183	0.0778905	0.0140472	-0.0185226	0.190362	Yes
XLOC_011545	0.0948104	0.0211417	0.0205055	0.311213	No
XLOC_011573	0.104316	0.0364173	0.034455	0.183543	No
XLOC_012192	0.231695	0.0627402	0.13242	0.385567	Yes
XLOC_012562	0.825213	0.974425	0.330143	0.446236	Yes
XLOC_012567	0.143207	0.0164882	0.0336145	0.345709	Yes
XLOC_012975	0.217927	0.0430984	0.111594	0.36478	No
XLOC_001326	0.0347726	0.00208661	-0.0636931	0.241992	No
XLOC_001327	0.0476959	0.00565354	-0.0585833	0.233472	Yes
XLOC_001329	0.0315597	0.0123622	-0.00312927	0.34785	Yes
XLOC_013431	0.109894	0.0175118	0.0542534	0.384488	No
XLOC_013981	0.0431851	0.0104252	-0.0893335	0.173394	No
XLOC_014270	0.0825963	0.0235591	-0.00880201	0.195	No
XLOC_001486	0.186549	0.0254488	0.0997374	0.431717	Yes
XLOC_001600	0.0776388	0.00888189	0.00177248	0.371063	Yes
XLOC_001602	0.178139	0.020315	0.0715697	0.414496	Yes
XLOC_001646	0.0653777	0.0246299	0.0171342	0.322543	No
XLOC_001943	0.0615794	0.0187087	0.00442789	0.233417	Yes
XLOC_002233	0.16561	0.0157323	0.0625252	0.427803	Yes
XLOC_002240	0.118321	0.0137953	0.0197726	0.352008	Yes
XLOC_002241	0.273656	0.0587559	0.1245	0.439189	Yes
XLOC_003153	0.0988091	0.0313701	0.065931	0.439717	No
XLOC_003411	0.111291	0.0374803	-0.0175208	0.154386	No
XLOC_000363	0.115672	0.0253858	0.0131713	0.114291	No
XLOC_003894	0.0749161	0.0215433	0.0330014	0.278394	No
XLOC_000390	0.186611	0.132362	0.00356932	0.120654	No
XLOC_004165	0.16831	0.0683858	0.0677031	0.246323	Yes
XLOC_004695	0.069473	0.0507559	-0.0894409	0.0962992	No
XLOC_004818	0.0734076	0.0158189	-0.0894409	0.0962992	No
XLOC_004847	0.216341	0.108669	-0.00449117	0.232819	No
XLOC_004926	0.0602611	0.00666929	0.06939	0.236543	No
XLOC_005397	0.176235	0.0307087	0.00163478	0.379079	Yes
XLOC_005417	0.184681	0.0687402	0.0825503	0.359528	Yes
XLOC_005464	0.0772767	0	0.0682685	0.229433	Yes
XLOC_005633	0.178052	0.0285354	0.0578751	0.347567	No
XLOC_005634	0.229119	0.0577008	0.0824877	0.304008	Yes
XLOC_005790	0.0785612	0.0135906	0.113137	0.450764	Yes
XLOC_000682	0.145702	0.0116968	0.0308016	0.358181	Yes
XLOC_006993	0.0664642	0.0353937	-0.0225705	0.345063	Yes
XLOC_007125	0.0683297	0.0185669	-0.0560567	0.153362	No
XLOC_007236	0.0681508	0.0154331	0.0144514	0.220827	Yes
XLOC_007243	0.0088862	0.00283465	-0.020929	0.186827	No
XLOC_000744	0.108665	0.0284961	-0.18303	0.181598	No
XLOC_007557	0.264605	0.0628661	0.0261206	0.252921	No
XLOC_007558	0.112326	0.0235512	0.162997	0.423362	Yes
XLOC_007620	0.0623417	0.0421535	-0.0153597	0.230465	No
XLOC_000777	0.358949	0.317094	0.119611	0.190449	No
XLOC_007795	0.101756	0.0232913	0.0618829	0.365898	No
XLOC_008326	0.125714	0.0765315	-0.0407805	0.064	No
XLOC_008367	0.0431369	0.0129449	-0.0645836	0.169803	No
XLOC_008500	0.156894	0.104181	0.0321694	0.225953	No
XLOC_008501	0.0911053	0.0269606	0.000996108	0.183394	No
XLOC_008525	0.0750032	0.0182598	-0.0177196	0.320228	No
XLOC_008632	0.100545	0.0177323	0.0299933	0.293976	Yes
XLOC_009358	0.106951	0.0236457	-0.0244625	0.228866	No
XLOC_009878	0.116676	0.0325591	0.0373356	0.380165	Yes
XLOC_009928	0.0982331	0.0272756	-0.00731375	0.230268	Yes
